# Supplementary material for: Azobenzene based multistimuli responsive supramolecular hydrogels
Source: Royal Society of Chemistry journal article supplement (doi:10.1039/c4tc01649a), 2014-01-01
Supplement: c4tc01649a1.pdf [file c4tc01649a1.pdf]

## Electronic Supplementary Information

# Azobenzene Based Multistimuli Responsive Supramolecular Hydrogels

Runmiao Yang,<sup>\*a,b</sup> Shuhua Peng,<sup>c</sup> Wubo Wan<sup>b,d</sup> and Timothy C. Hughes<sup>\*b</sup>

<sup>a</sup> Department of Material Engineering, Jiangsu University of Technology, Changzhou, 213001, China. Tel: +86-519- 86953291; E-mail: yangrunmiao@jsut.edu.cn

<sup>b</sup> CSIRO Materials Science and Engineering, Bayview Avenue, Melbourne, VIC 3168, Australia. Tel: +61-3-95452503; E-mail: tim.hughes@csiro.au

<sup>c</sup> Department of Chemical and Biomolecular Engineering, University of Melbourne, Melbourne, VIC 3010, Australia.

<sup>d</sup> Carbon Research Laboratory, Liaoning Key Lab for Energy Materials and Chemical Engineering, State Key Lab of Fine Chemicals, Dalian University of Technology, Dalian 116024, China

## Experimental Section

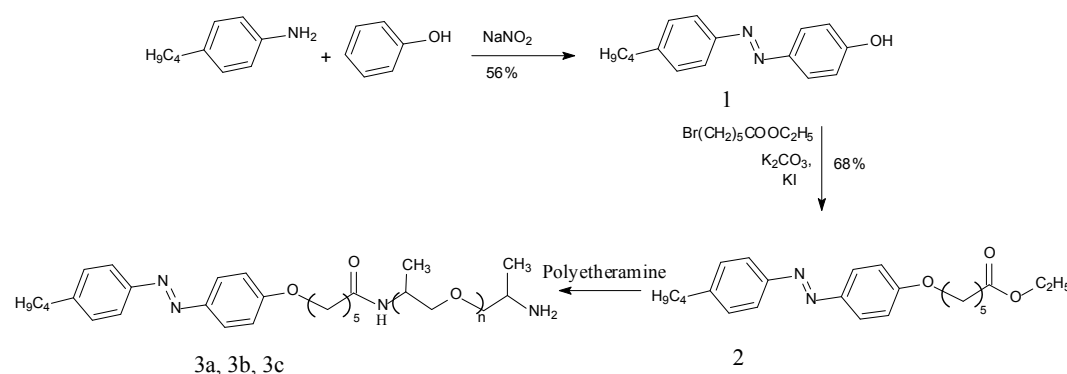

**Scheme S1.** Synthesis of C<sub>4</sub>-Azo-C<sub>5</sub>-D<sub>230</sub> (n=2.5), C<sub>4</sub>-Azo-C<sub>5</sub>-D<sub>400</sub> (n=6.1), C<sub>4</sub>-Azo-C<sub>5</sub>-ED<sub>900</sub> (n=18.5).

**Compound 1.** A solution of sodium nitrite (2.27 g, 32.04 mmol in 15.7 mL of water) is added drop wise to a suspension of 4.5 g (26.70 mmol) of 4-butylaniline in a mixture of 10 mL HCl and 30 mL of water, keeping the temperature below 5 °C. After 30 min. for stirring, the diazonium salt is formed. Then, 3.05 g of phenol (32.04 mmol) is added. The reaction was stirred for 1 hour. The solution was made basic with 100 mL of a saturated solution of NaHCO<sub>3</sub>. A brown solid precipitated, which was filtered off and washed with distilled water. The product was isolated by recrystallization with ethanol. Mp: 68-69°C, Yield: 56%.

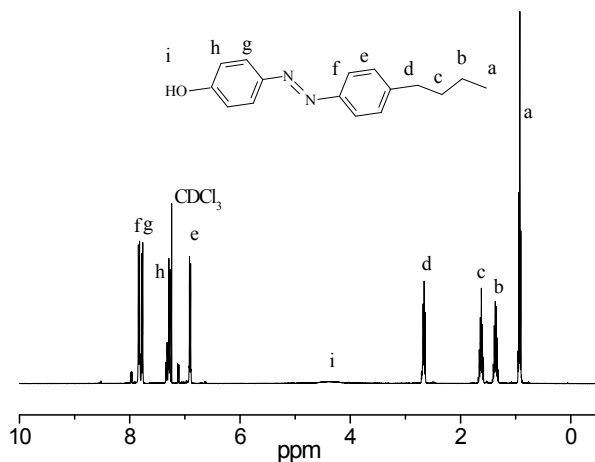

**Fig. S1**  $^1\text{H}$  NMR spectrum of compound 1 in  $\text{CDCl}_3$ .

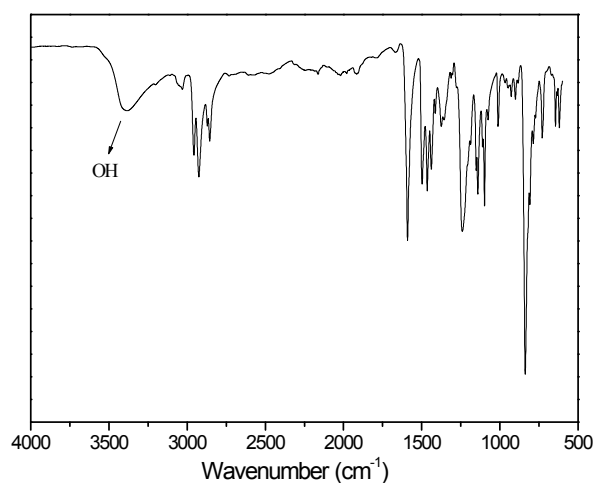

**Fig. S2** FTIR spectrum of compound 1.

**Compound 2.** 18.5 mmol of compound **1**, anhydrous  $\text{K}_2\text{CO}_3$  (5.11 g, 37.0 mmol) and KI (0.100 g) were dissolved in 100 mL of acetone, under nitrogen atmosphere. After 10 minutes stirring, 22.2 mmol of ethyl 6-bromohexanoate were added drop wise via syringe while the solution was refluxing. The mixture was stirred overnight under reflux. After cooling down to room temperature, salt solid was filtered off and acetone was evaporated. The product was recrystallized with ethanol. Mp: 60-62 °C, Yield: 68%.

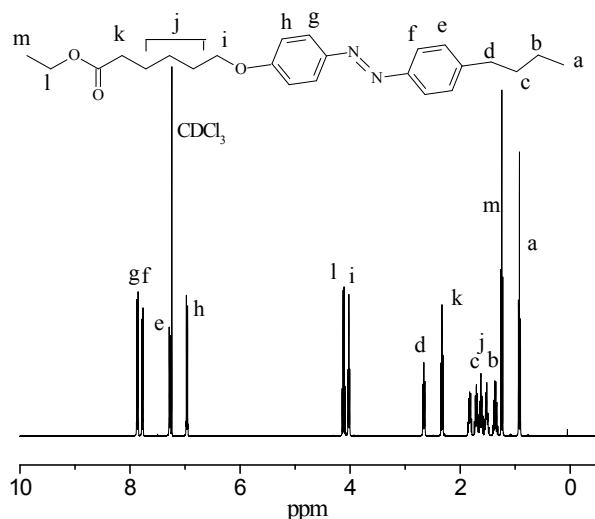

**Fig. S3**  $^1\text{H}$  NMR spectrum of compound 2 in  $\text{CDCl}_3$ .

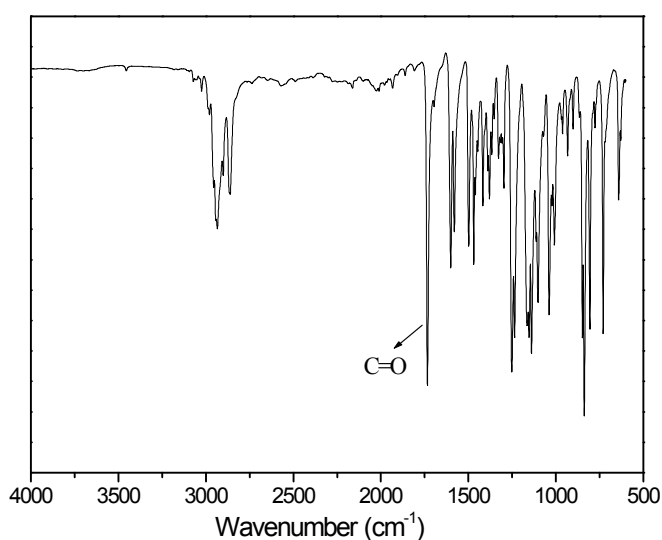

**Fig. S4** FTIR spectrum of compound 2.

**Compound 3b.** 3.0g  $\text{D}_{400}$  (dissolved in 10 mL dichloromethane) and 0.05 g (dispersed in 1 mL ethanol) of sodium ethylate were added in flask. Then 1.0 g of the corresponding compound 2 was dissolved in dichloromethane (15 mL) was added in between 10 mins. The reaction mixture was heated to 30  $^{\circ}\text{C}$ , and stirred overnight. Then, the mixture was cooled to room temperature. The solid was filtered off and then it was washed with dichloromethane. Finally, the product was dried in the vacuum oven at 30  $^{\circ}\text{C}$  overnight. Yield: 48%.

Compound 3a was synthesized according to the similar method with compound

3b using D<sub>230</sub> instead of D<sub>400</sub> in same molar rate. Yield: 50%.

Compound 3c was synthesized according to the similar method with compound 3b using ED<sub>900</sub> instead of D<sub>400</sub> in same molar rate. Yield: 47%.

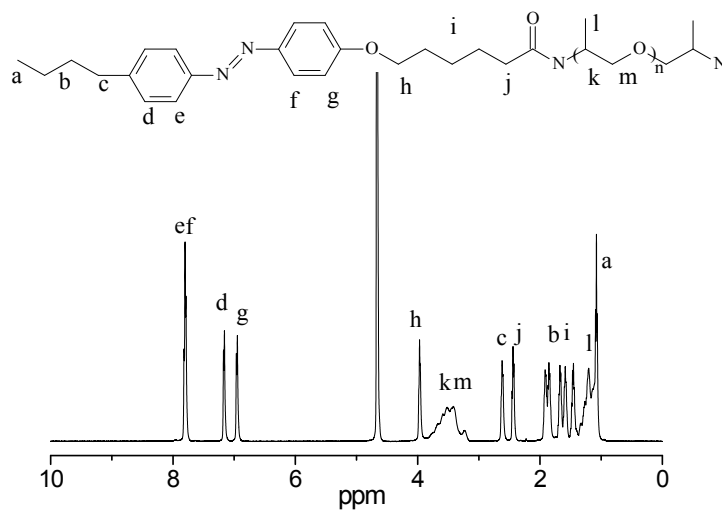

**Fig. S5**  $^1\text{H}$  NMR spectrum of compound 3b in  $\text{D}_2\text{O}$ .

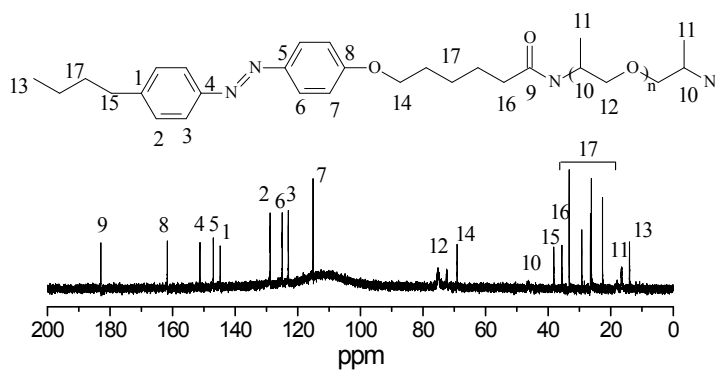

**Fig. S6**  $^{13}\text{C}$  NMR spectrum of compound 3b in  $\text{D}_2\text{O}$ .

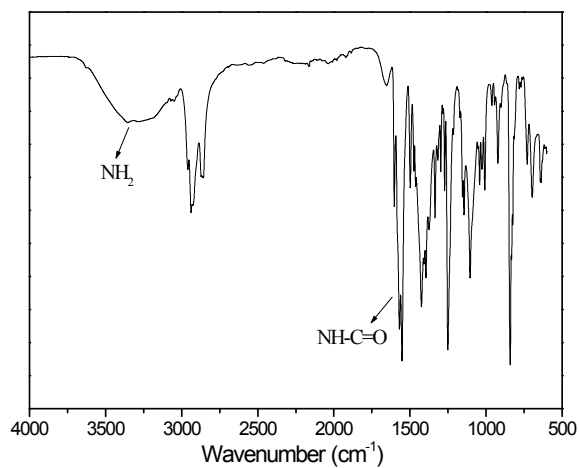

**Fig. S7** FTIR spectrum of compound 3b.

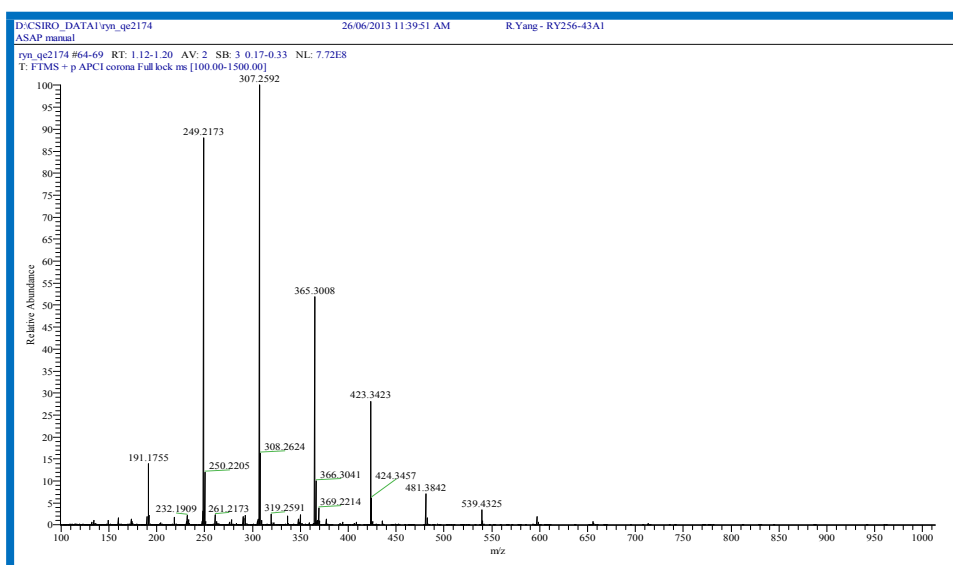

**Fig. S8** HRMS spectrum of compound 3b.

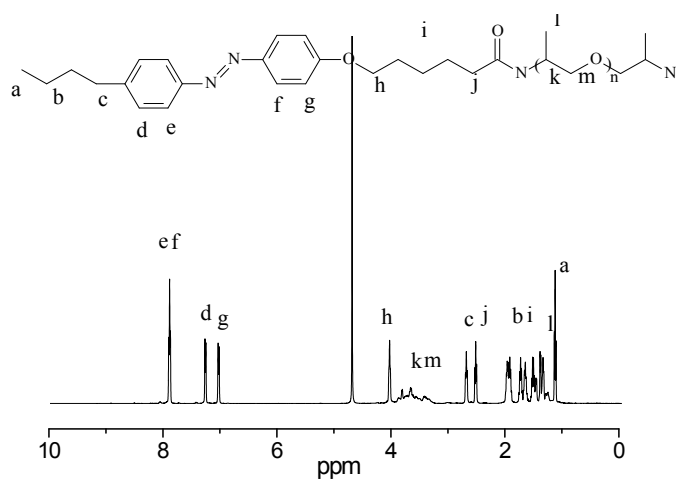

**Fig. S9**  $^1\text{H}$  NMR spectrum of compound 3a in  $\text{D}_2\text{O}$ .

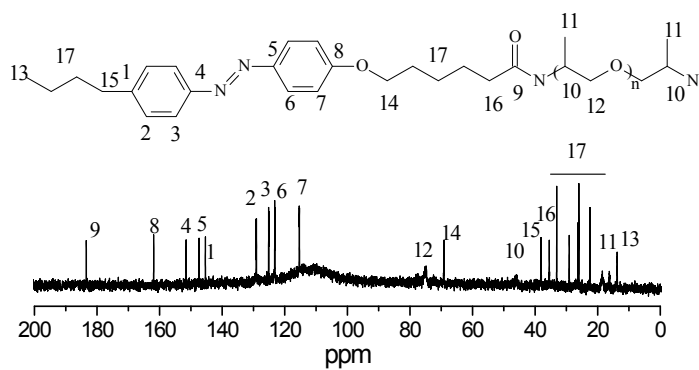

**Fig. S10**  $^{13}\text{C}$  NMR spectrum of compound 3a in  $\text{D}_2\text{O}$ .

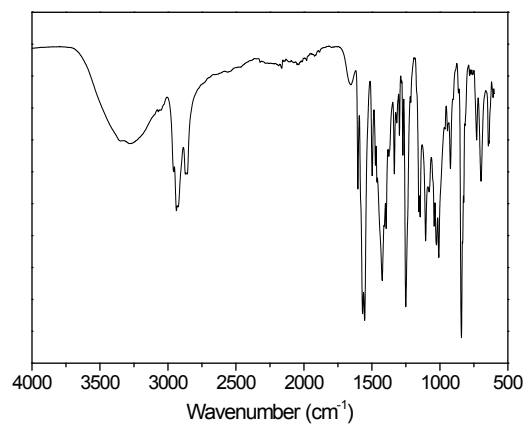

**Fig. S11** FTIR spectrum of compound 3a.

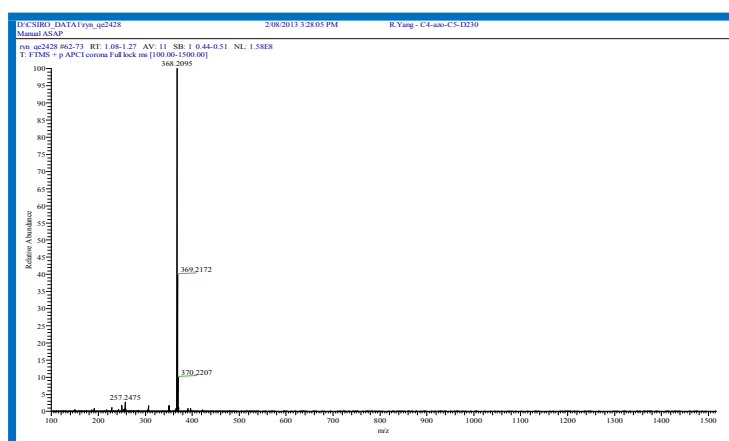

**Fig. S12** HRMS spectrum of compound 3a.

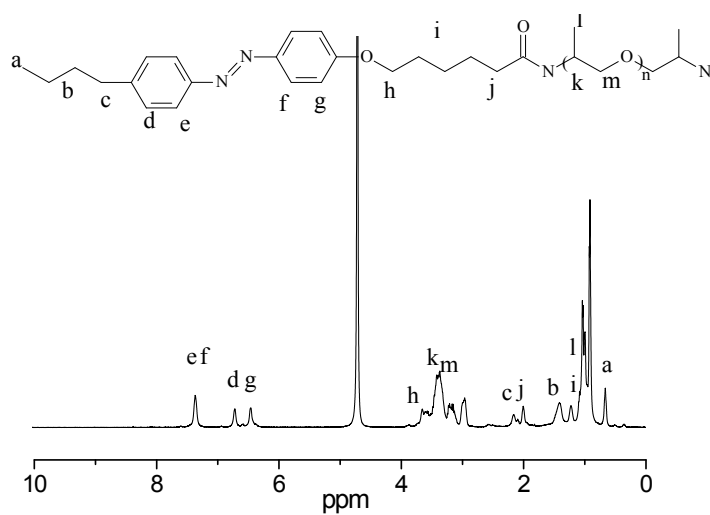

**Fig. S13**  $^1\text{H}$  NMR spectrum of compound 3c in  $\text{D}_2\text{O}$ .

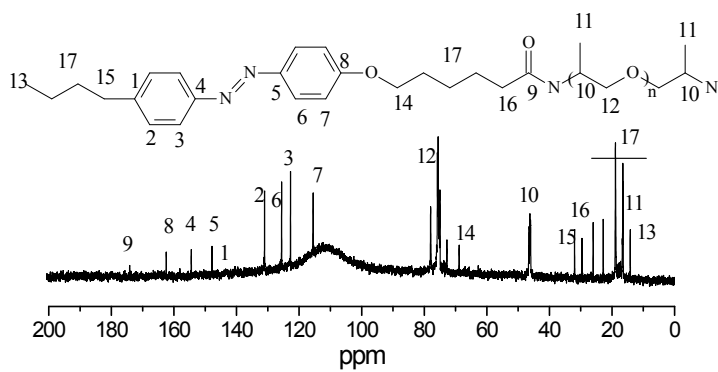

**Fig. S14**  $^{13}\text{C}$  NMR spectrum of compound 3c in  $\text{D}_2\text{O}$ .

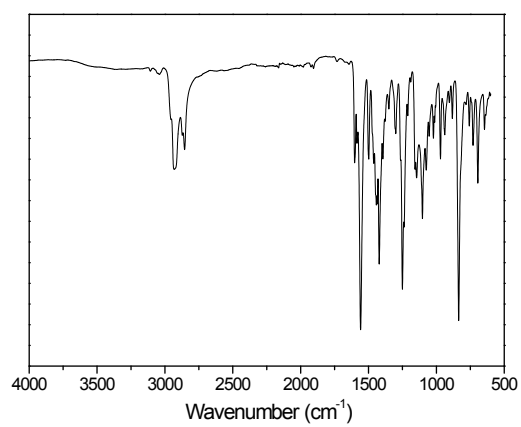

**Fig. S15** FTIR spectrum of compound 3c.

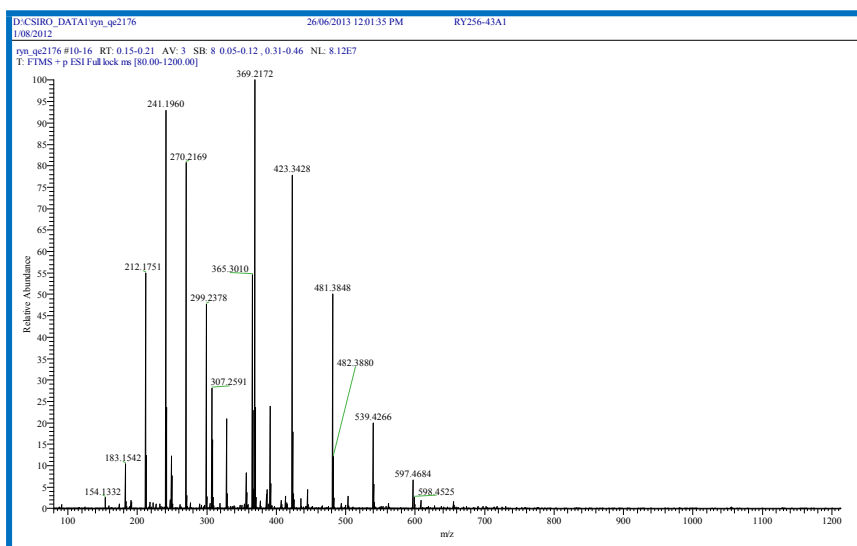

**Fig. S16** HRMS spectrum of compound 3c.

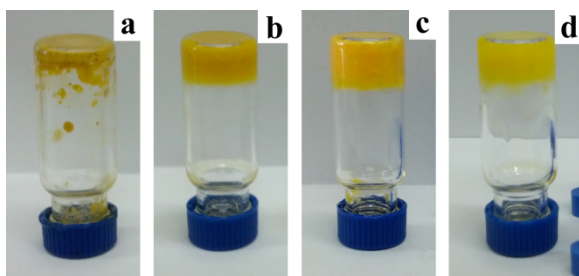

**Fig. S17** Photographs of the  $C_4$ -Azo- $C_5$ - $D_{400}$  hydrosol at (a) 30.0 wt% (b) 10.0 wt% (c) 3.0 wt% (d) 1.0 wt%.

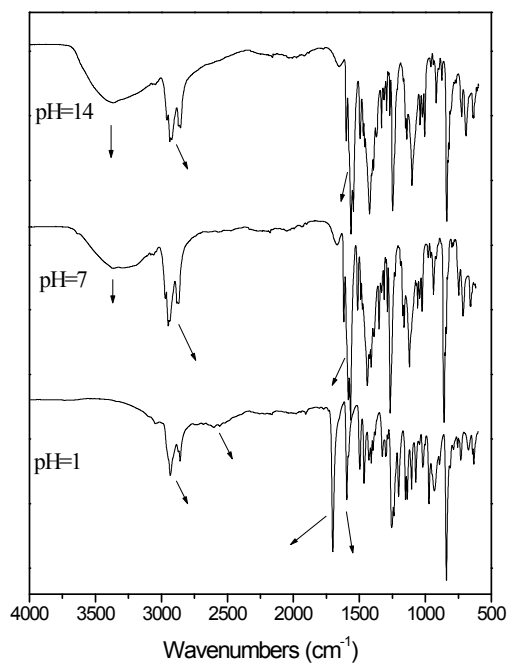

**Fig. S18** FT-IR study of the  $C_4$ -Azo- $C_5$ - $D_{400}$  obtained from different pH.



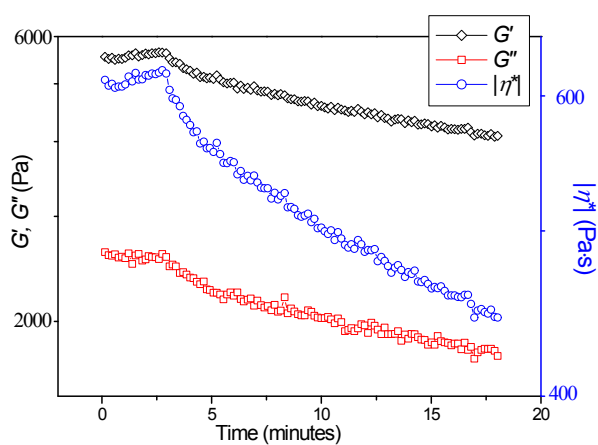

**Fig. S19** Real-time photo-rheology measurements.  $C_4$ -Azo- $C_5$ -D<sub>400</sub> in water at 20 °C (10.0 wt %). The data were obtained at a constant frequency of 5 rad/s and a strain of 1.0 %. UV turned on at 3 min.

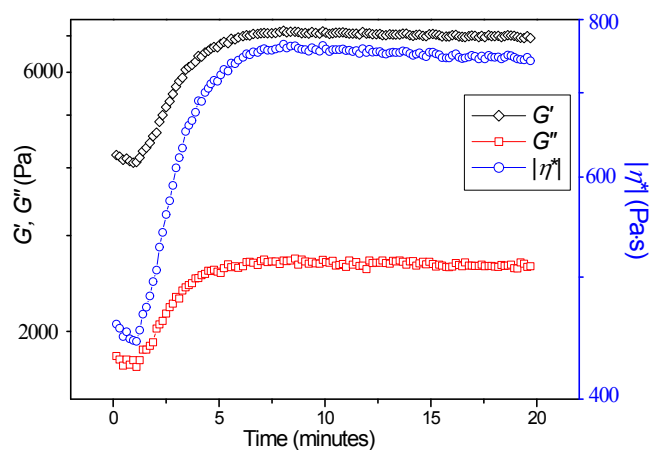

**Fig. S20** Real-time photo-rheology measurements.  $C_4$ -Azo- $C_5$ -D<sub>400</sub> in water at 20 °C (10.0 wt %). The data were obtained at a constant frequency of 5 rad/s and a strain of 1.0 %. Visible light turned on at 1.0 min.

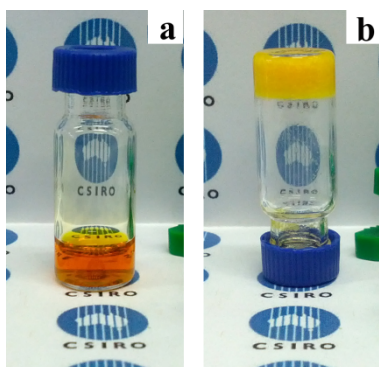

**Fig. S21** Hydrogel formed from a solution of  $C_4$ -Azo- $C_5$ -D<sub>400</sub> in water (10 wt%) (a) solution, 70 °C and (b) gel, 20 °C.

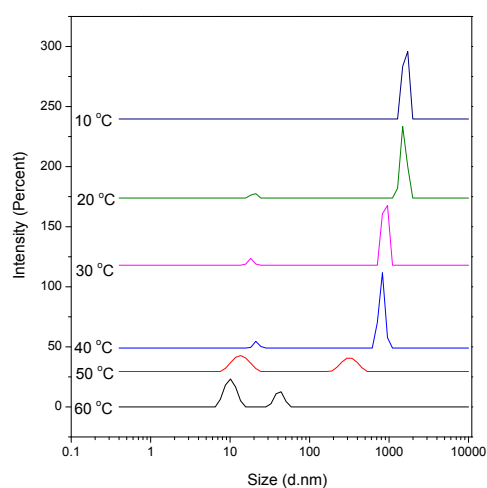

**Fig. S22** DLS study of the C<sub>4</sub>-Azo-C<sub>5</sub>-D<sub>400</sub> obtained from different temperature, (0.2 wt%).

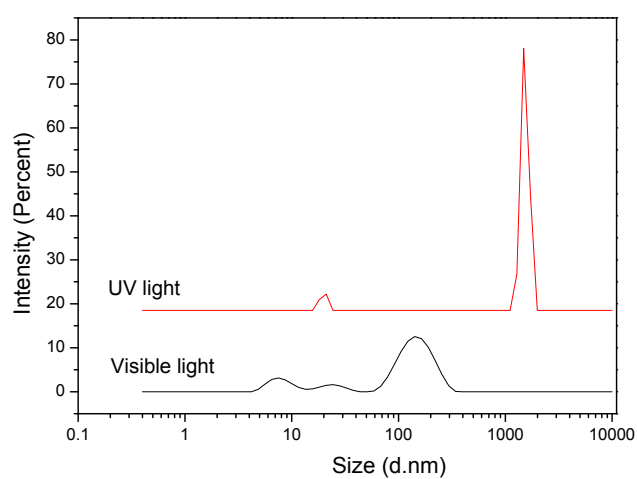

**Fig. S23** DLS study of the C<sub>4</sub>-Azo-C<sub>5</sub>-D<sub>400</sub> obtained before (red line) and after (black line) upon UV light (365 nm, 20 mW/cm<sup>2</sup>) exposure at 20 °C, 0.2 wt%.

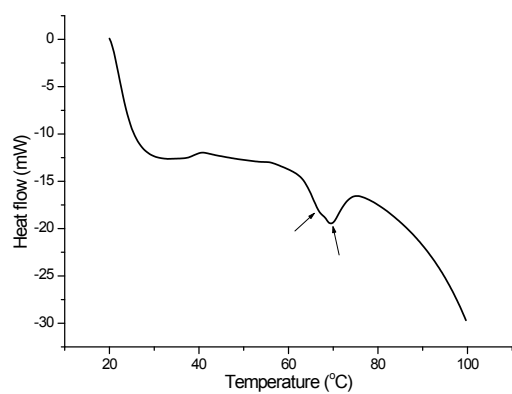

**Fig. S24** DSC curves of the C<sub>4</sub>-Azo-C<sub>5</sub>-D<sub>400</sub> in water (10 wt%)
